# Supplementary material for: Sodium–oxygen batteries with alkyl-carbonate and ether based electrolytes
Source: Royal Society of Chemistry journal article supplement (doi:10.1039/c3cp43225d), 2013-01-01
Supplement: c3cp43225d.pdf [file c3cp43225d.pdf]

***Electronic Supplementary Information***

**Sodium-Oxygen Batteries with  
Alkyl-carbonate and Ether based Electrolytes**

Jinsoo Kim,<sup>a</sup> Hee-dae Lim,<sup>a</sup> Hyeokjo Gwon<sup>b</sup> and Kisuk Kang<sup>a\*</sup>

<sup>a</sup> *Department of Materials Science and Engineering, Seoul National University, 1*

*Gwanak-ro, Gwanak-gu, Seoul 151-742, Republic of Korea.*

<sup>b</sup> *Department of Materials Science and Engineering, KAIST, 291 Daehak-ro, Yuseong-gu,*

*Daejeon 305-701, Republic of Korea.*

Fax: 82-2-880-8197

Tel: 82-2-880-7088

E-mail: matlgen1@snu.ac.kr

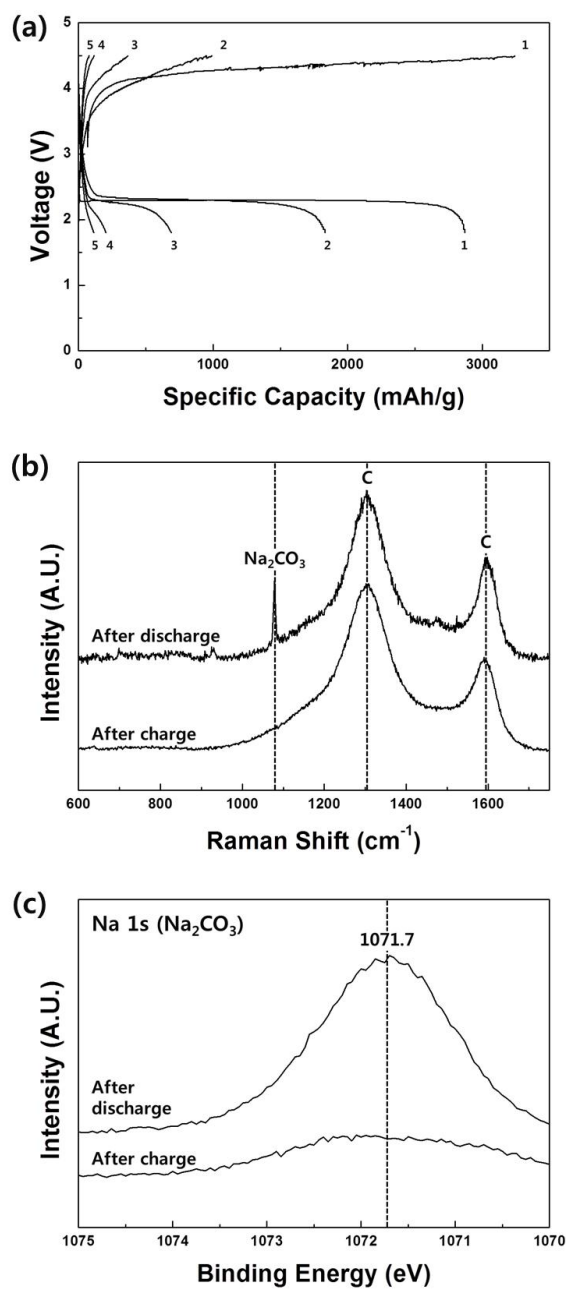

**Fig. S1** (a) Cycleability of the sodium-oxygen battery with PC electrolyte, (b) Raman spectra, and (c) XPS of the electrode during discharging/charging

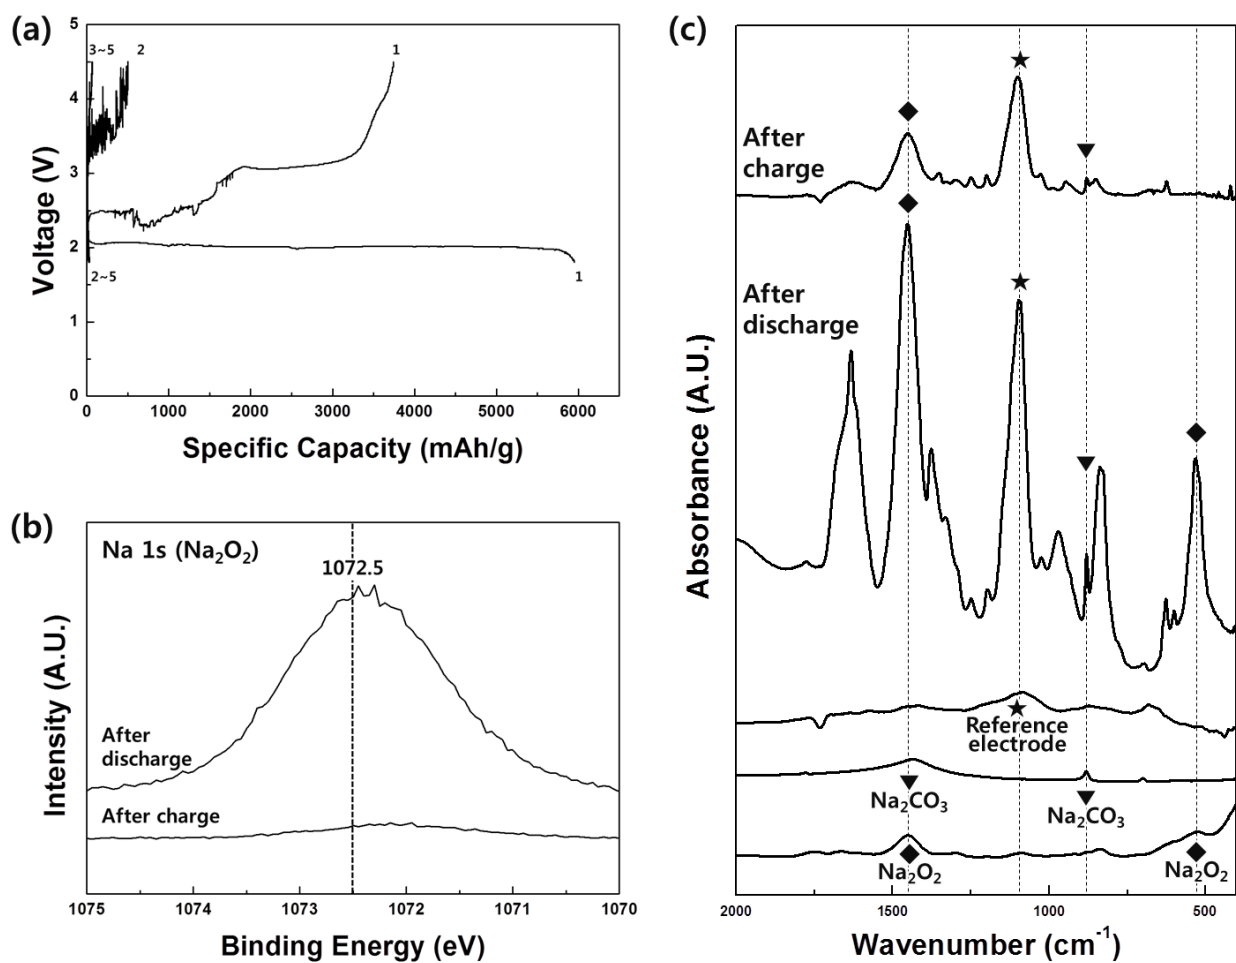

**Fig. S2** (a) Cycleability of the sodium-oxygen battery with TEGDME electrolyte, (b) XPS, and (c) FTIR spectra of the electrode during discharging/charging
